# Supplementary material for: Estimation of ground-level NO 2 and its spatiotemporal variations in China using GEMS measurements and a nested machine learning model
Source: Copernicus journal article supplement (doi:10.5194/acp-24-9645-2024), 2024-08-30
Supplement: Supplementary file 1 [file acp-24-9645-2024-supplement.pdf]

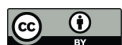

*Supplement of*

## **Estimation of ground-level NO<sub>2</sub> and its spatiotemporal variations in China using GEMS measurements and a nested machine learning model**

**Naveed Ahmad et al.**

*Correspondence to:* Changqing Lin (cqlin@ust.hk)

The copyright of individual parts of the supplement might differ from the article licence.

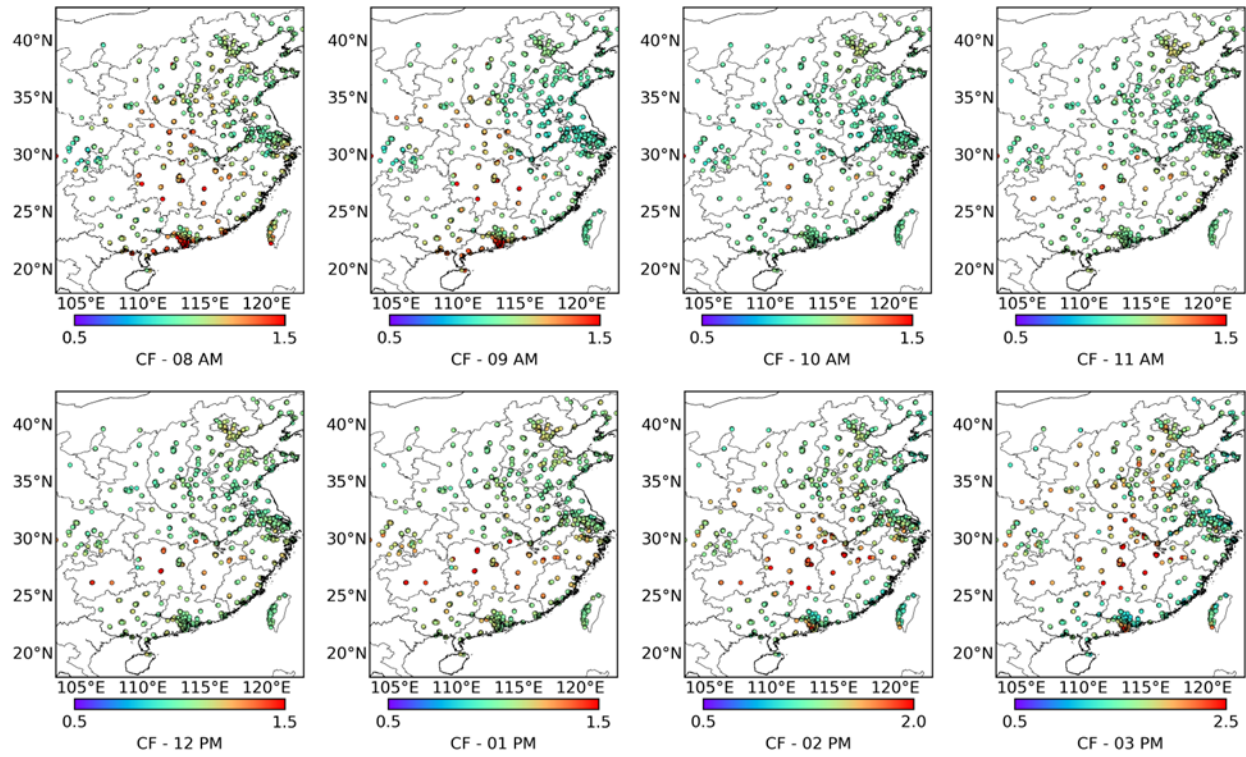

Figure S1: Spatial distributions of station-based correction factor between 8:00 AM and 3:00 PM (UTC+8) for 2021.

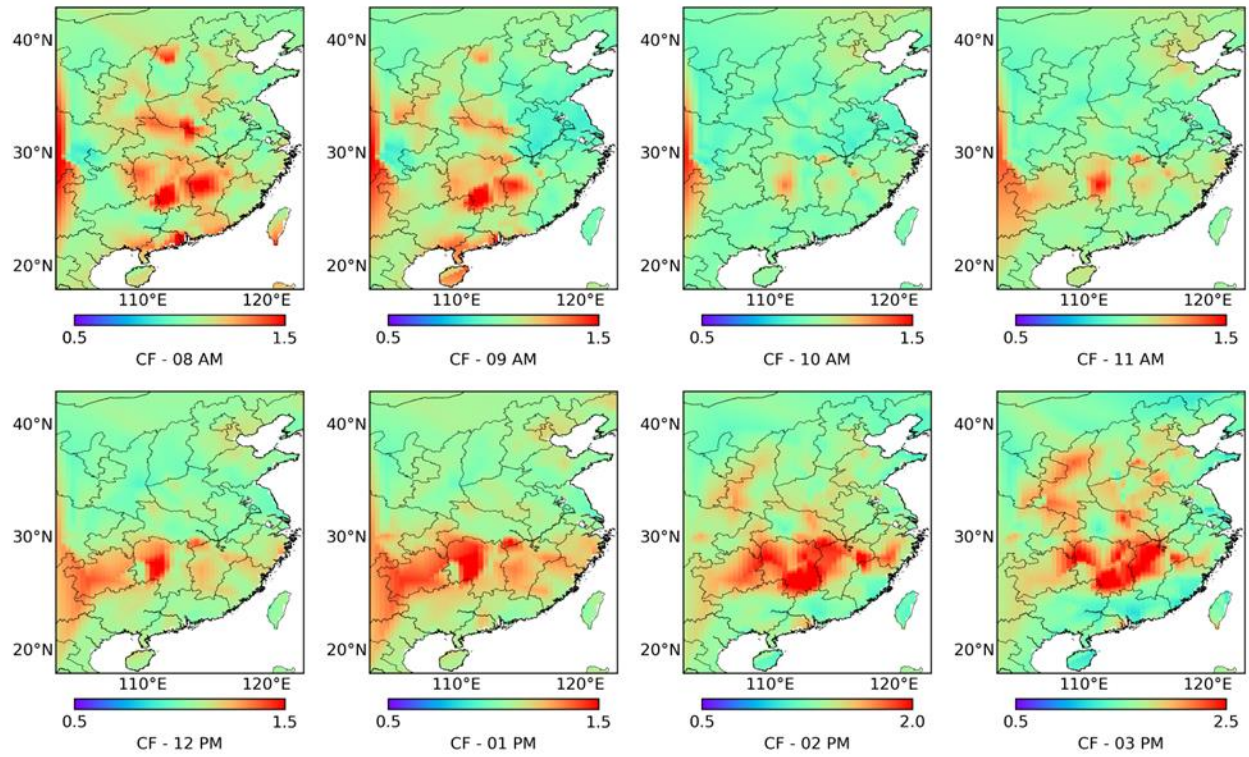

**Figure S2: Spatial distributions of interpolated correction factor from individual hours between 8:00 AM and 3:00 PM (UTC+8) for 2021.**

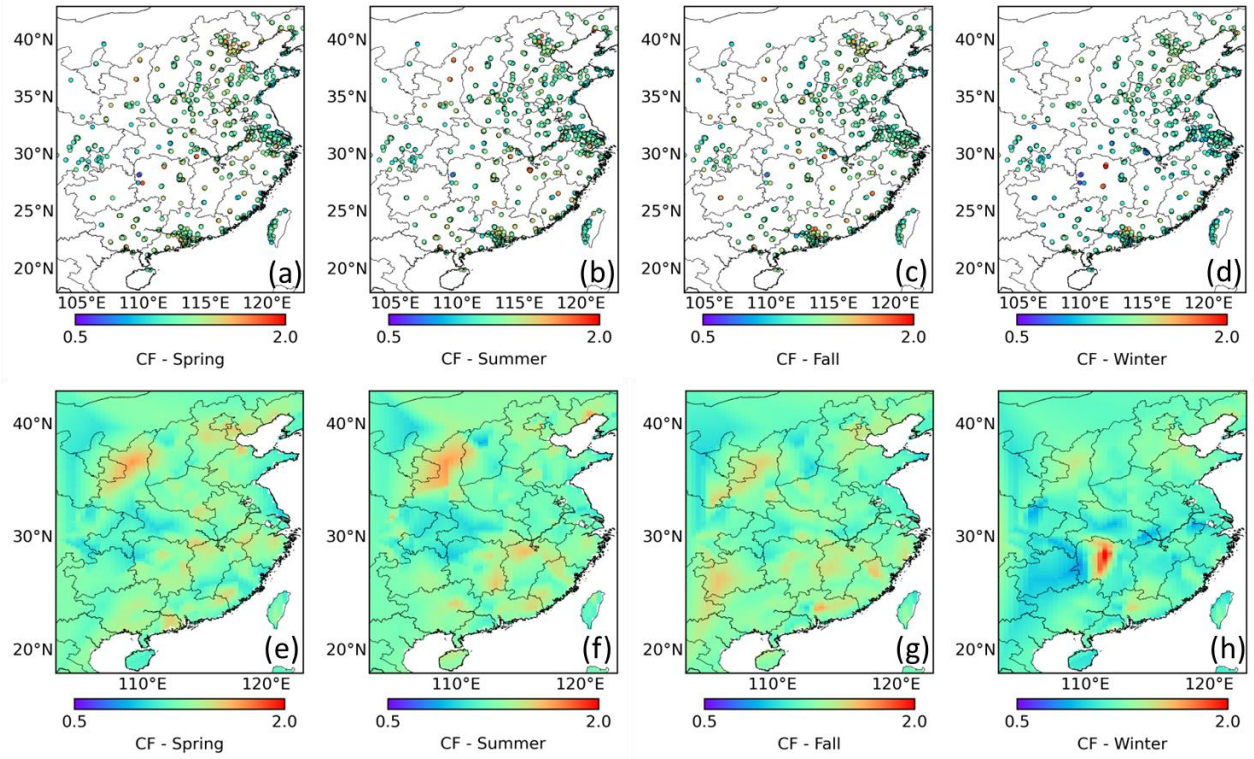

**Figure S3: Spatial distributions of (a-d) station-based and (e-h) interpolated correction factors for estimating seasonal mean of NO<sub>2</sub> concentration for 2021.**

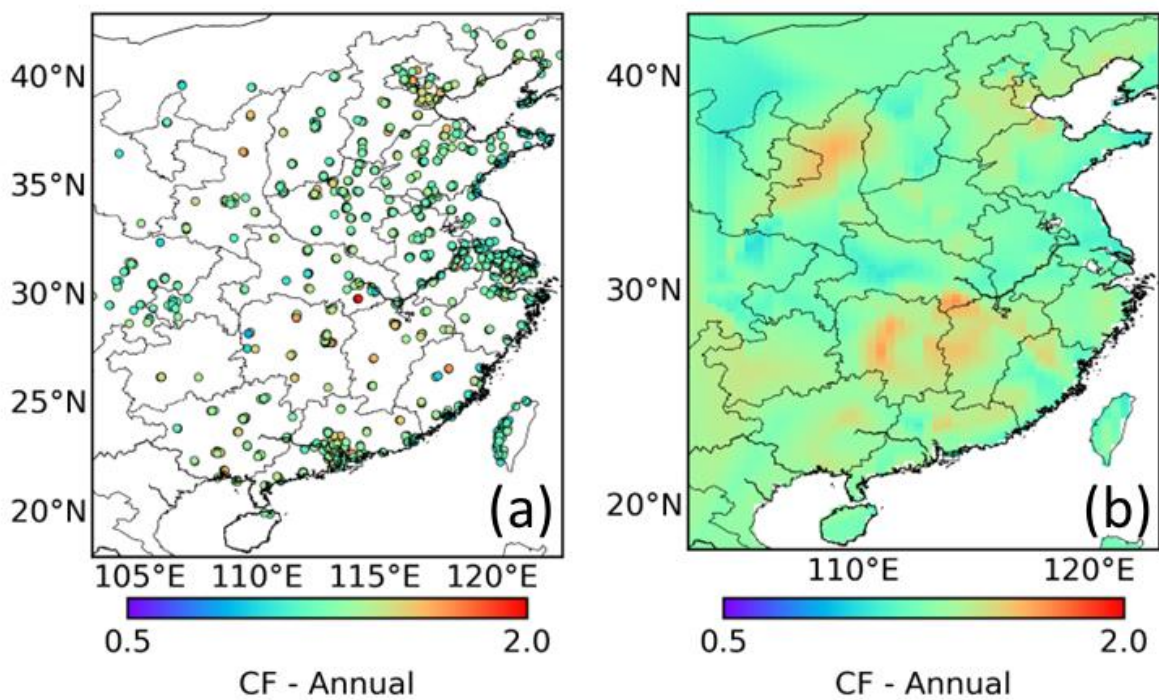

Figure S4: Spatial distribution of (a) station-based and (b) interpolated correction factors for estimating annual mean NO<sub>2</sub> concentration for 2021.



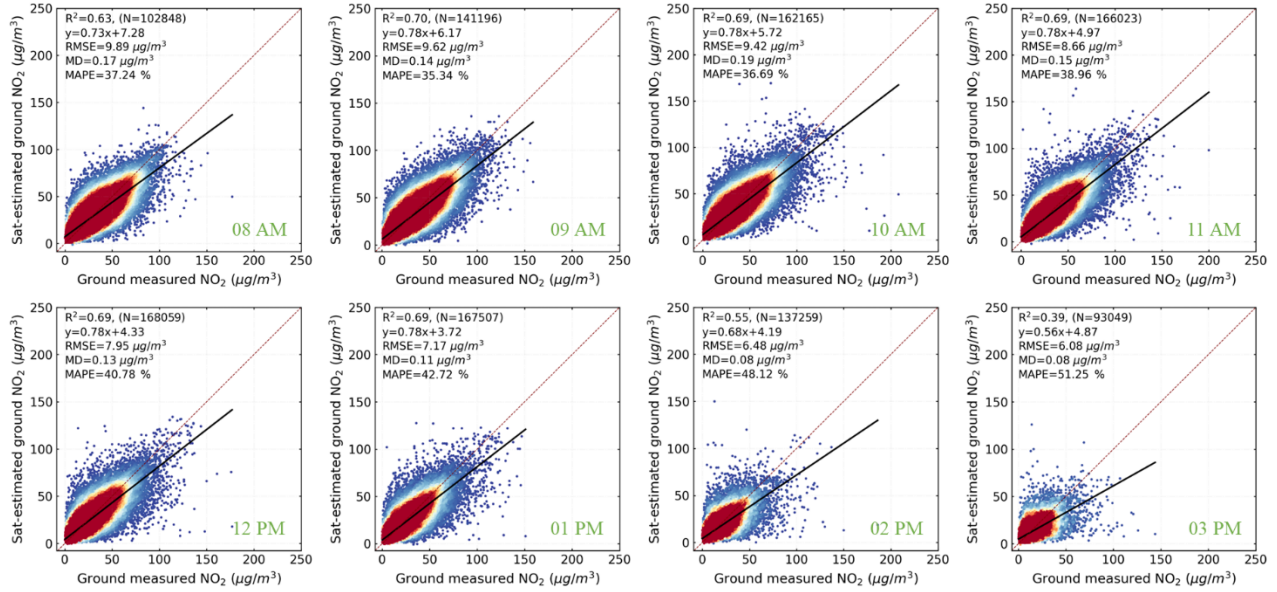

**Figure S5:** Hour-by-hour 10-fold cross-validation of satellite-estimated ground-level NO<sub>2</sub> concentrations for basic Model I without considering the NMH. The red dotted line represents a 1:1 relationship. The solid black line is the line of best fit between the ground-measured NO<sub>2</sub> and the satellite-estimated NO<sub>2</sub>. The scattered dots represent the individual NO<sub>2</sub> values for each ground measurement and satellite-based estimation. The color scale ranging from red to blue represents the density of the NO<sub>2</sub> values, with red indicating high density and blue representing low density.

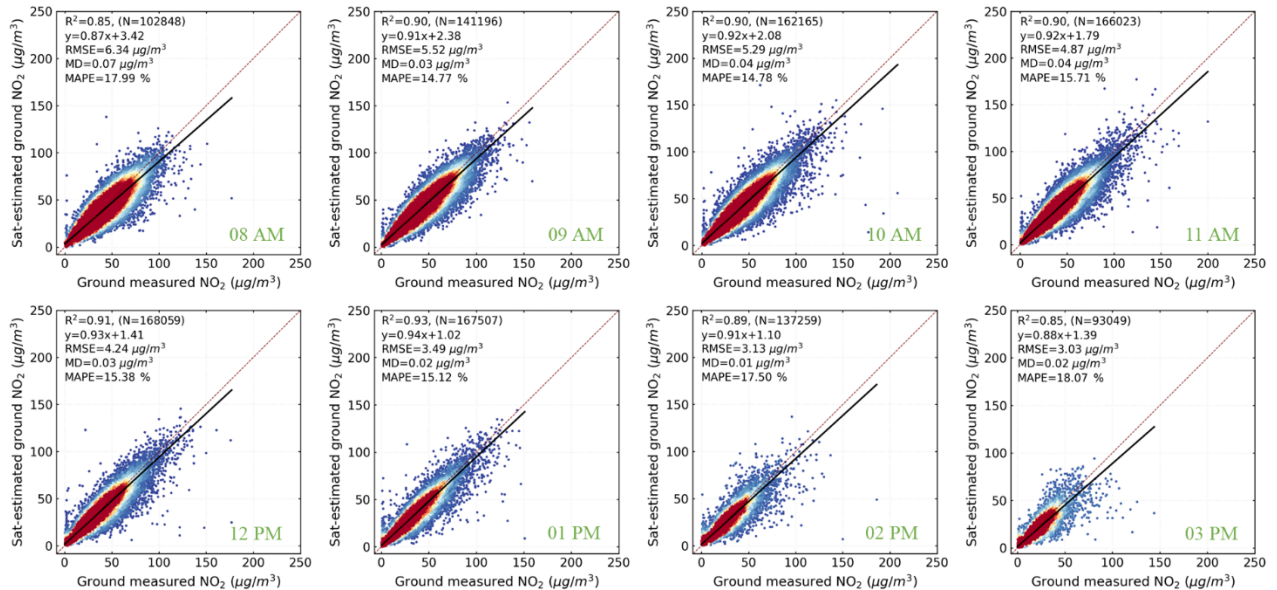

**Figure S6:** Hour-by-hour 10-fold cross-validation of satellite-estimated ground-level NO<sub>2</sub> concentrations for nested Model II after considering the NMH. The red dotted line represents a 1:1 relationship. The solid black line is the line of best fit between the ground-measured NO<sub>2</sub> and the satellite-estimated NO<sub>2</sub>. The scattered dots represent the individual NO<sub>2</sub> values for each ground measurement and satellite-based estimation. The color scale ranging from red to blue represents the density of the NO<sub>2</sub> values, with red indicating high density and blue representing low density.

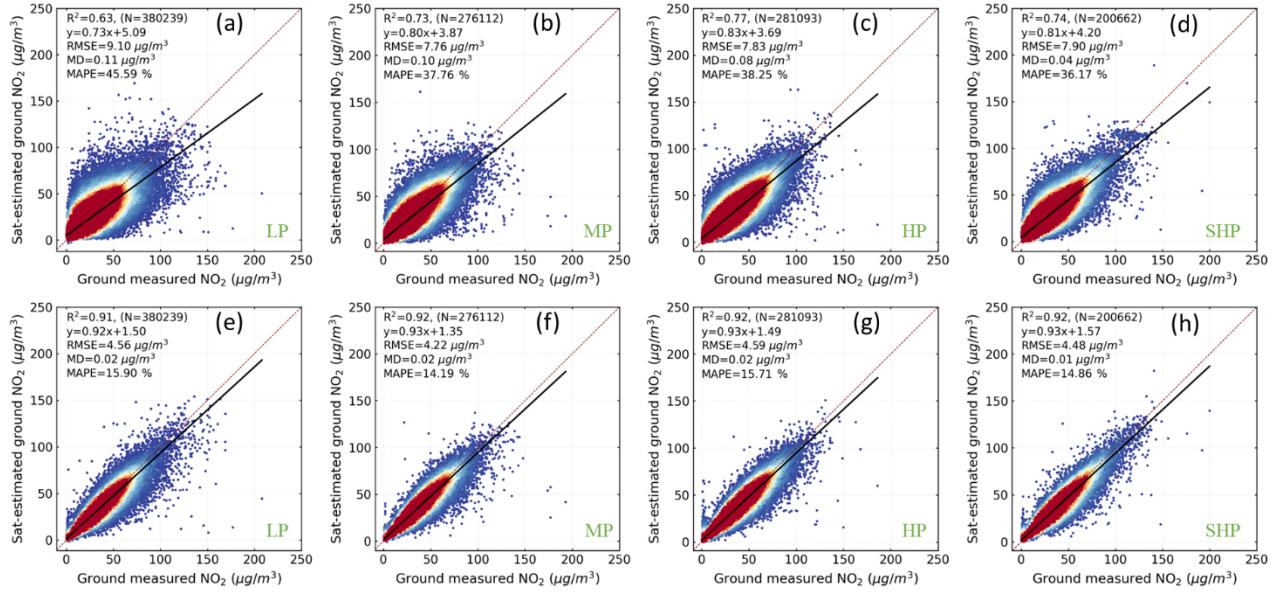

**Figure S7: 10-fold cross-validation for different population categories: lightly populated (LP, first column), moderately populated (MP, second column), highly populated (HP, third column), and supremely highly populated (SHP, last column). (a-d) for basic Model I without considering the NMH. (e-h) for nested Model II after considering the NMH. The red dotted line represents a 1:1 relationship. The solid black line is the line of best fit between the ground-measured NO<sub>2</sub> and the satellite-estimated NO<sub>2</sub>. The scattered dots represent the individual NO<sub>2</sub> values for each ground measurement and satellite-based estimation. The color scale ranging from red to blue represents the density of the NO<sub>2</sub> values, with red indicating high density and blue representing low density.**

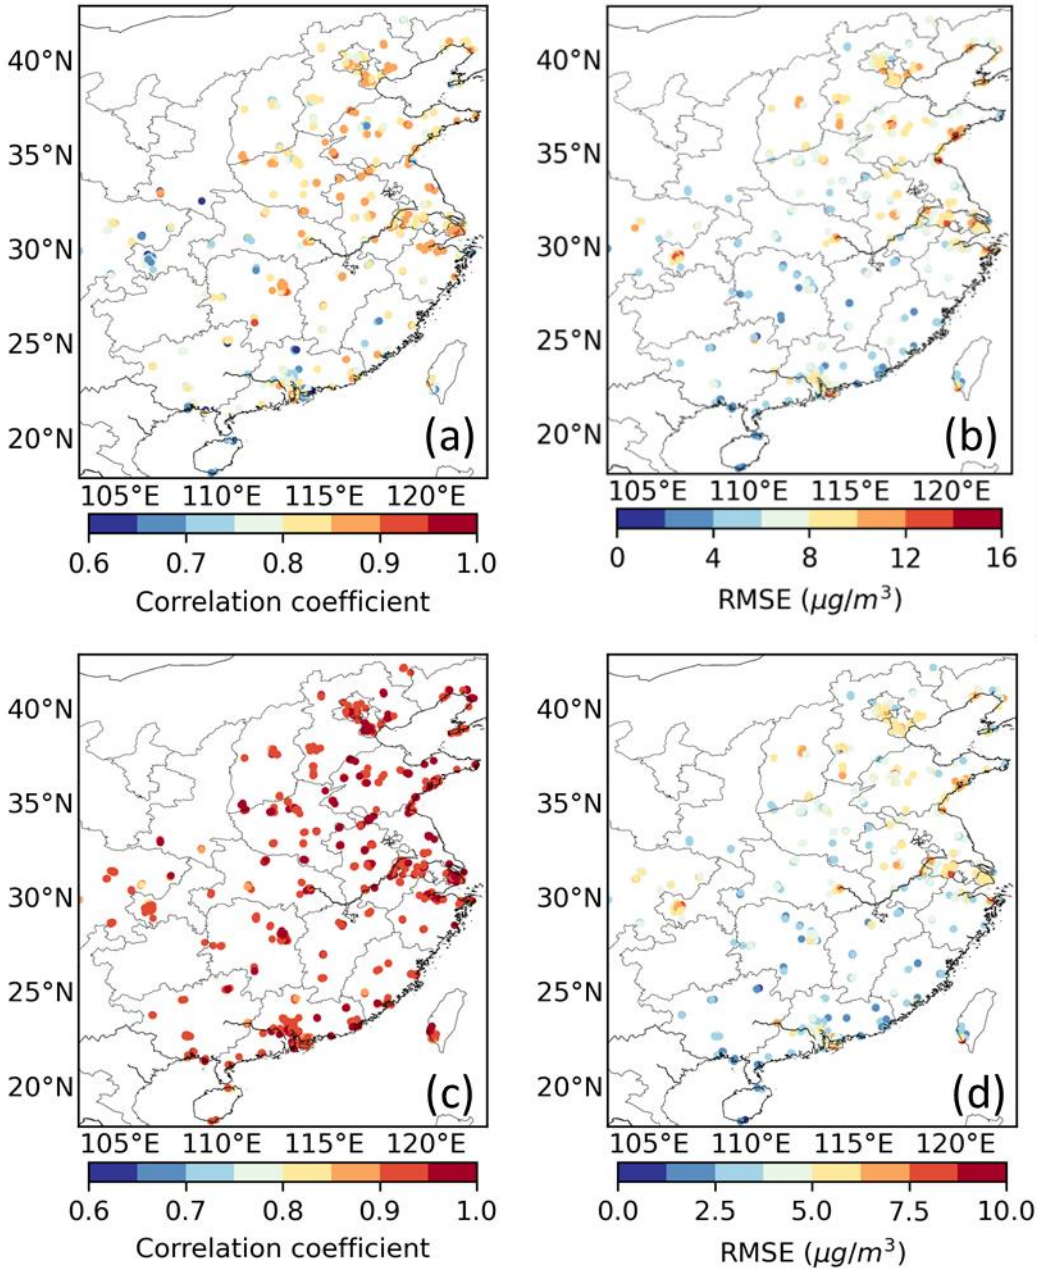

Figure S8: Grid-based 10-fold cross-validation where ground-based observations are available. (a-b) for basic Model I without considering the NMH. (c-d) for nested Model II after considering NMH. Each circle on the map represents a grid point for which ground-based observations are available.
